# Supplementary material for: Revealing the unexpected promotion effect of diverse potassium precursors on α-MnO2 for the catalytic destruction of toluene
Source: Royal Society of Chemistry journal article supplement (doi:10.1039/c9cy02347j), 2020-01-01
Supplement: c9cy02347j1.pdf [file c9cy02347j1.pdf]

## Supplementary material

### **Revealing the unexpected promotion effect of diverse potassium-precursors on $\alpha$ -MnO<sub>2</sub> for toluene catalytic destruction**

Qing Zhu<sup>1,†</sup>, Zeyu Jiang<sup>1,†</sup>, Mudi Ma<sup>1,†</sup>, Chi He<sup>1,2,\*</sup>, Yanke Yu<sup>3</sup>, Xiaohe Liu<sup>1,\*</sup>, Reem Albilali<sup>4</sup>

*<sup>1</sup>State Key Laboratory of Multiphase Flow in Power Engineering, School of Energy and Power Engineering, Xi'an Jiaotong University, Xi'an 710049, Shaanxi, P.R. China*

*<sup>2</sup>National Engineering Laboratory for VOCs Pollution Control Material & Technology, University of Chinese Academy of Sciences, Beijing 101408, P.R. China*

*<sup>3</sup>Department of Chemical Engineering, Columbia University, New York 10027, United States*

*<sup>4</sup>Department of Chemistry, College of Science, Imam Abdulrahman Bin Faisal University, P.O. Box 1982, Dammam 31441, Saudi Arabia*

†These authors contributed equally to this work.

\*To whom correspondence should be addressed:

Tel./Fax: +86 29 82663857; E-mail: chi\_he@xjtu.edu.cn (C. He)

Tel./Fax: +86 29 82668169; E-mail: xiaohe-liu@outlook.com (X.H. Liu)

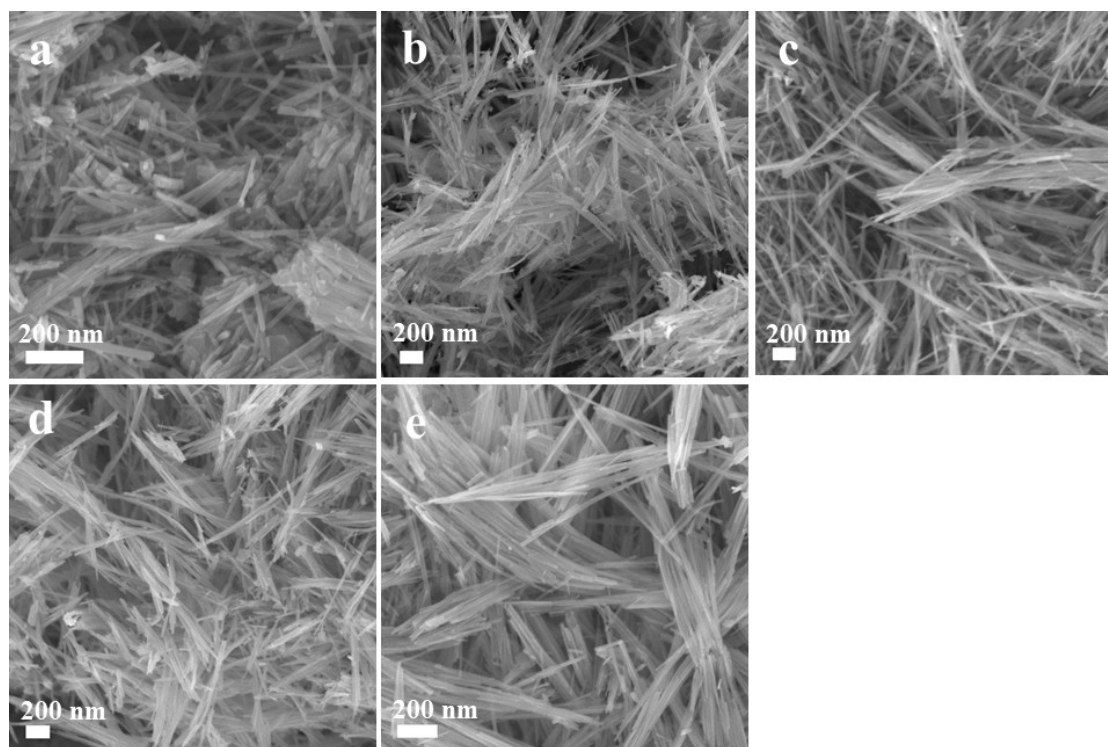

**Fig. S1** SEM images of synthesized catalysts: (a) MnO<sub>2</sub>; (b) KOH/MnO<sub>2</sub>; (c) KCl/MnO<sub>2</sub>; (d) K<sub>2</sub>SO<sub>4</sub>/MnO<sub>2</sub> and (e) KNO<sub>3</sub>/MnO<sub>2</sub>.

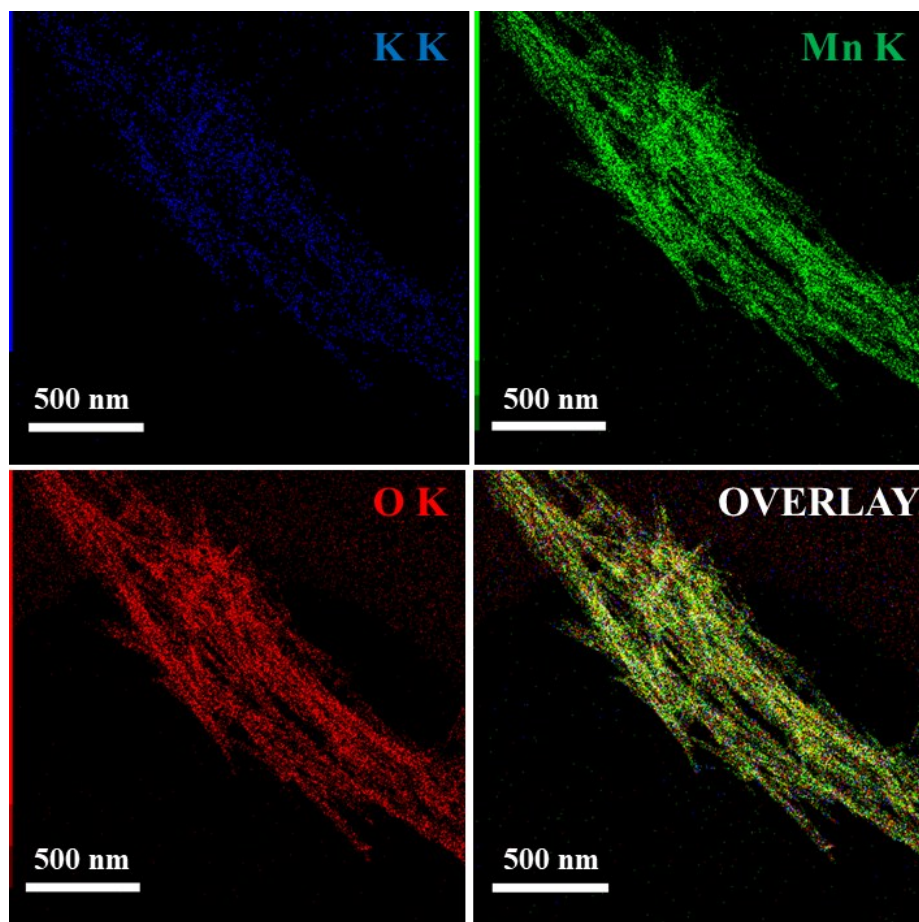

**Fig. S2** SEM-EDX mapping of KOH/MnO<sub>2</sub> catalyst.

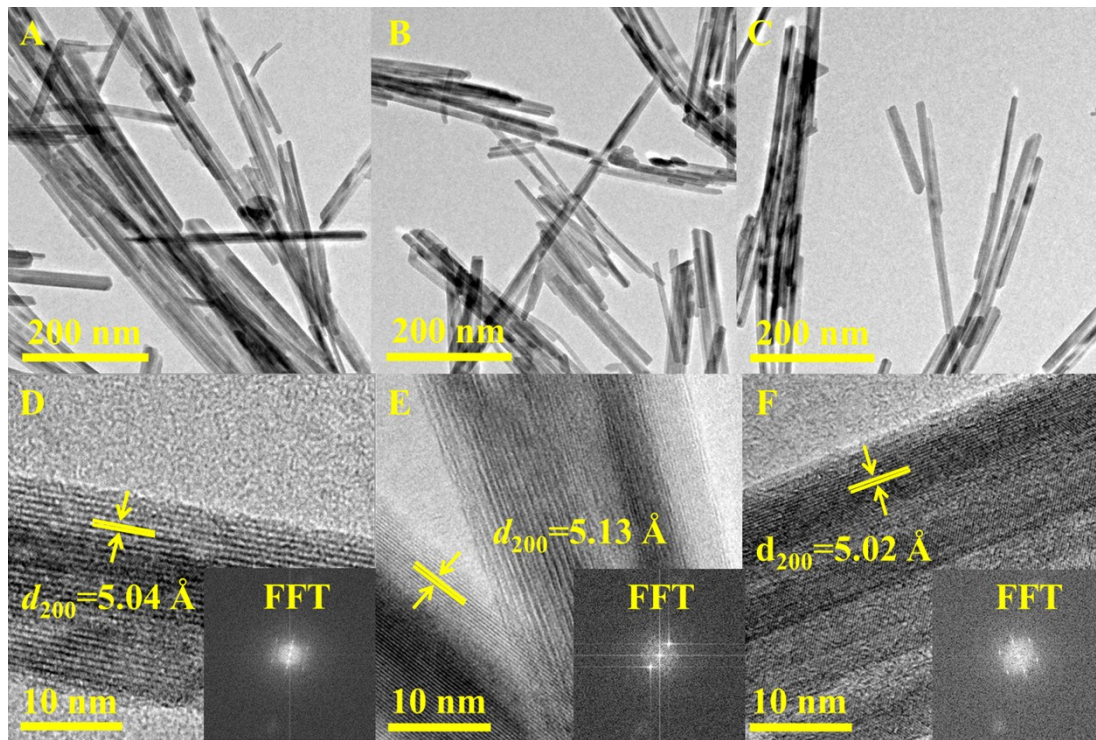

**Fig. S3** (A, D) HR-TEM images of  $\text{KCl/MnO}_2$ ; (B, E) HR-TEM images of  $\text{K}_2\text{SO}_4/\text{MnO}_2$ ; (C, F) HR-TEM images of  $\text{KNO}_3/\text{MnO}_2$ .

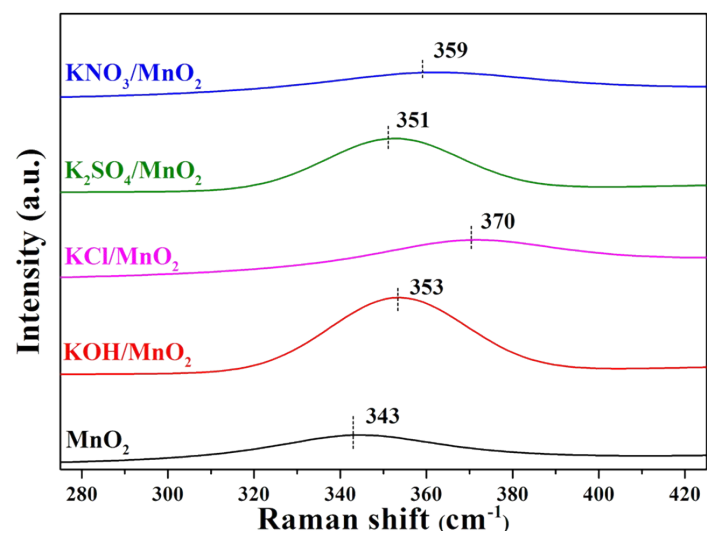

**Fig. S4** Laser Raman spectra of prepared materials

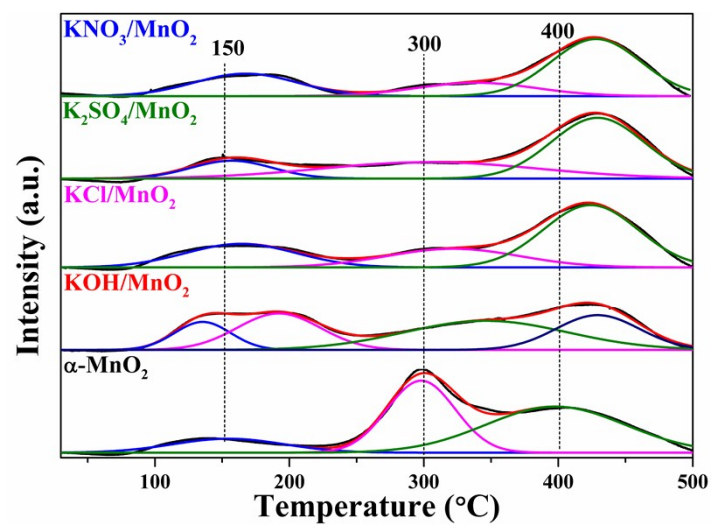

Fig. S5 NH<sub>3</sub>-TPD spectra of prepared materials

**Table S1** XRF results of all synthesized catalysts.

| Samples                                          | K content wt.% | Mn content wt.% | O content wt.% |
|--------------------------------------------------|----------------|-----------------|----------------|
| MnO <sub>2</sub>                                 | 0              | 56.9            | 43.1           |
| KOH/MnO <sub>2</sub>                             | 4.7            | 56.2            | 39.1           |
| KCl/MnO <sub>2</sub>                             | 2.4            | 57.6            | 40.0           |
| K <sub>2</sub> SO <sub>4</sub> /MnO <sub>2</sub> | 3.0            | 57.1            | 39.9           |
| KNO <sub>3</sub> /MnO <sub>2</sub>               | 3.1            | 54.4            | 42.5           |

**Table S2** Reducibility of all synthesized samples.

| Sample                                           | Reduction temperature (°C) |        | H <sub>2</sub> consumption (mmol/g) |        |       |
|--------------------------------------------------|----------------------------|--------|-------------------------------------|--------|-------|
|                                                  | Peak 1                     | Peak 2 | Peak 1                              | Peak 2 | Total |
| MnO <sub>2</sub>                                 | 397                        | 573    | 4.01                                | 2.21   | 6.22  |
| KOH/MnO <sub>2</sub>                             | 346                        | 403    | 6.51                                | 1.34   | 7.85  |
| KCl/MnO <sub>2</sub>                             | 385                        | 437    | 7.14                                | 1.39   | 8.54  |
| K <sub>2</sub> SO <sub>4</sub> /MnO <sub>2</sub> | 401                        | 460    | 7.30                                | 1.08   | 8.38  |
| KNO <sub>3</sub> /MnO <sub>2</sub>               | 373                        | 426    | 6.89                                | 1.37   | 8.26  |



**Table S3** Summarized percentage of mass lost from thermos-gravimetry analysis.

| Sample                                           | Temperature (°C) |         |         |         |
|--------------------------------------------------|------------------|---------|---------|---------|
|                                                  | 30-200           | 200-300 | 300-700 | 200-700 |
| MnO <sub>2</sub>                                 | 2.5              | 0.4     | 7.2     | 7.6     |
| KOH/MnO <sub>2</sub>                             | 1.6              | 1.0     | 9.5     | 10.5    |
| KCl/MnO <sub>2</sub>                             | 1.9              | 0.7     | 10.5    | 11.2    |
| K <sub>2</sub> SO <sub>4</sub> /MnO <sub>2</sub> | 2.2              | 0.8     | 10.0    | 10.8    |
| KNO <sub>3</sub> /MnO <sub>2</sub>               | 3.3              | 1.6     | 8.2     | 9.8     |

**Table S4** The assigned peaks obtained from NH<sub>3</sub>-TPD results.

| Sample                                           | Temperature (°C) |        |       | Peak area |        |        |       |
|--------------------------------------------------|------------------|--------|-------|-----------|--------|--------|-------|
|                                                  | Peak 1           | Peak 2 | Peak3 | Peak 1    | Peak 2 | Peak 3 | Total |
| MnO <sub>2</sub>                                 | 155              | 298    | 398   | 57        | 180    | 236    | 473   |
| KOH/MnO <sub>2</sub>                             | 172              | 349    | 430   | 181       | 172    | 105    | 458   |
| KCl/MnO <sub>2</sub>                             | 164              | 322    | 424   | 96        | 91     | 217    | 404   |
| K <sub>2</sub> SO <sub>4</sub> /MnO <sub>2</sub> | 157              | 304    | 429   | 53        | 131    | 206    | 390   |
| KNO <sub>3</sub> /MnO <sub>2</sub>               | 168              | 339    | 428   | 85        | 58     | 187    | 330   |
